# Supplementary material for: Identification of 3-Phenylquinoline Derivative PQ1 as an Antagonist of p53 Transcriptional Activity
Source: PubMed Central journal article supplement — ACS Omega. 2022 Nov 15;7(47):43180–9. doi: 10.1021/acsomega.2c05891 (PMC9713874; doi:10.1021/acsomega.2c05891), 2022-11-15
Supplement: ao2c05891_si_001.pdf [file ao2c05891_si_001.pdf]

# Identification of 3-phenylquinoline derivative PQ1 as an antagonist of p53 transcriptional activity

## Supplementary Material

Xingkang Wu<sup>a,b,c,\*</sup>, Lu Wang<sup>a</sup>, Zhenyu Li<sup>d,\*</sup>

<sup>a</sup> Modern Research Center for Traditional Chinese Medicine, the Key Laboratory of Chemical Biology and Molecular Engineering of Ministry of Education, Shanxi University, No. 92, Wucheng Road, Taiyuan 030006, Shanxi, P. R. China.

<sup>b</sup> Key Laboratory of Effective Substances Research and Utilization in TCM of Shanxi Province, No. 92, Wucheng Road, Taiyuan 030006, Shanxi, P. R. China.

<sup>c</sup> Shanxi Key Laboratory of Redevelopment of Famous Local Traditional Chinese Medicines, No. 92, Wucheng Road, Taiyuan 030006, Shanxi, P. R. China.

<sup>d</sup> Department of Pharmacy, Shandong Provincial Hospital Affiliated to Shandong First Medical University, Jinan, Shandong 250021, P.R. China.

**\*Corresponding author:** Xingkang Wu, [wuxingkang@sxu.edu.cn](mailto:wuxingkang@sxu.edu.cn); Zhenyu Li, [liz613@mail.sdu.edu.cn](mailto:liz613@mail.sdu.edu.cn)

## Supplementary Figures

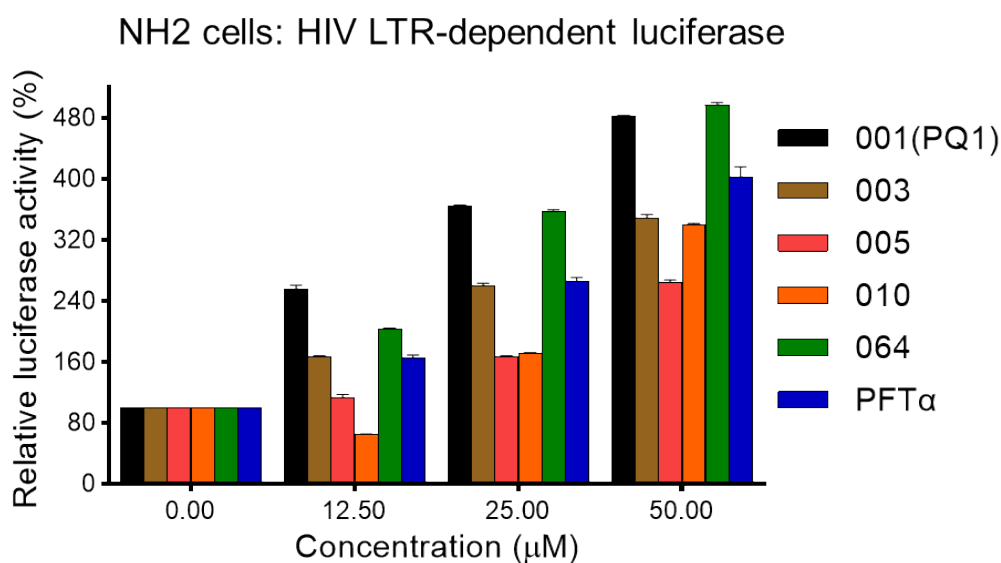

**Figure S1. The effects of screened p53 inhibitors on the activity of HIV LTR-dependent luciferase.** NH2 cells expressing HIV LTR-dependent luciferase were treated by indicated compounds for 24 h, and subjected to luciferase reporter assays.

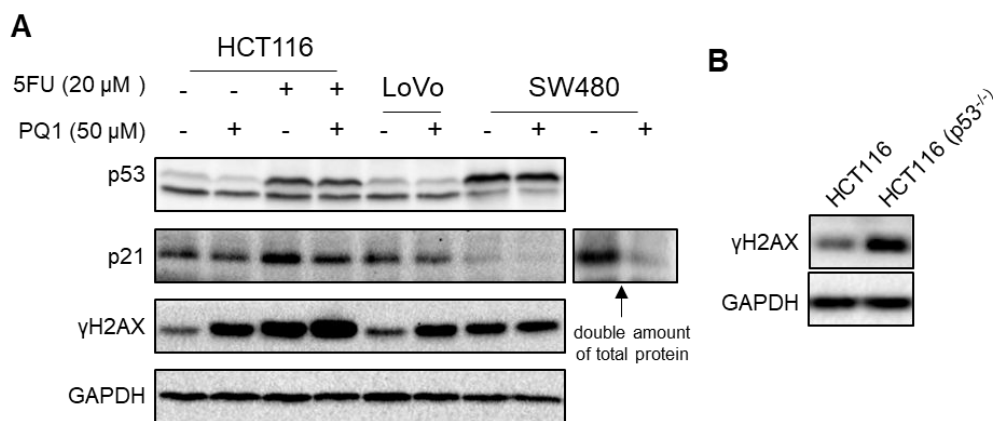

**Figure S2. The relationship between p53 deficiency and DNA damage response.**

(A) Western blot analysis of indicated protein expression in HCT116, LoVo and SW480 cells treated by PQ1. Cells were treated with indicated treatment for 24 h and subjected to western blotting analysis. (B) Western blot analysis of indicated protein expression in HCT116, and HCT116(p53<sup>-/-</sup>) cells.

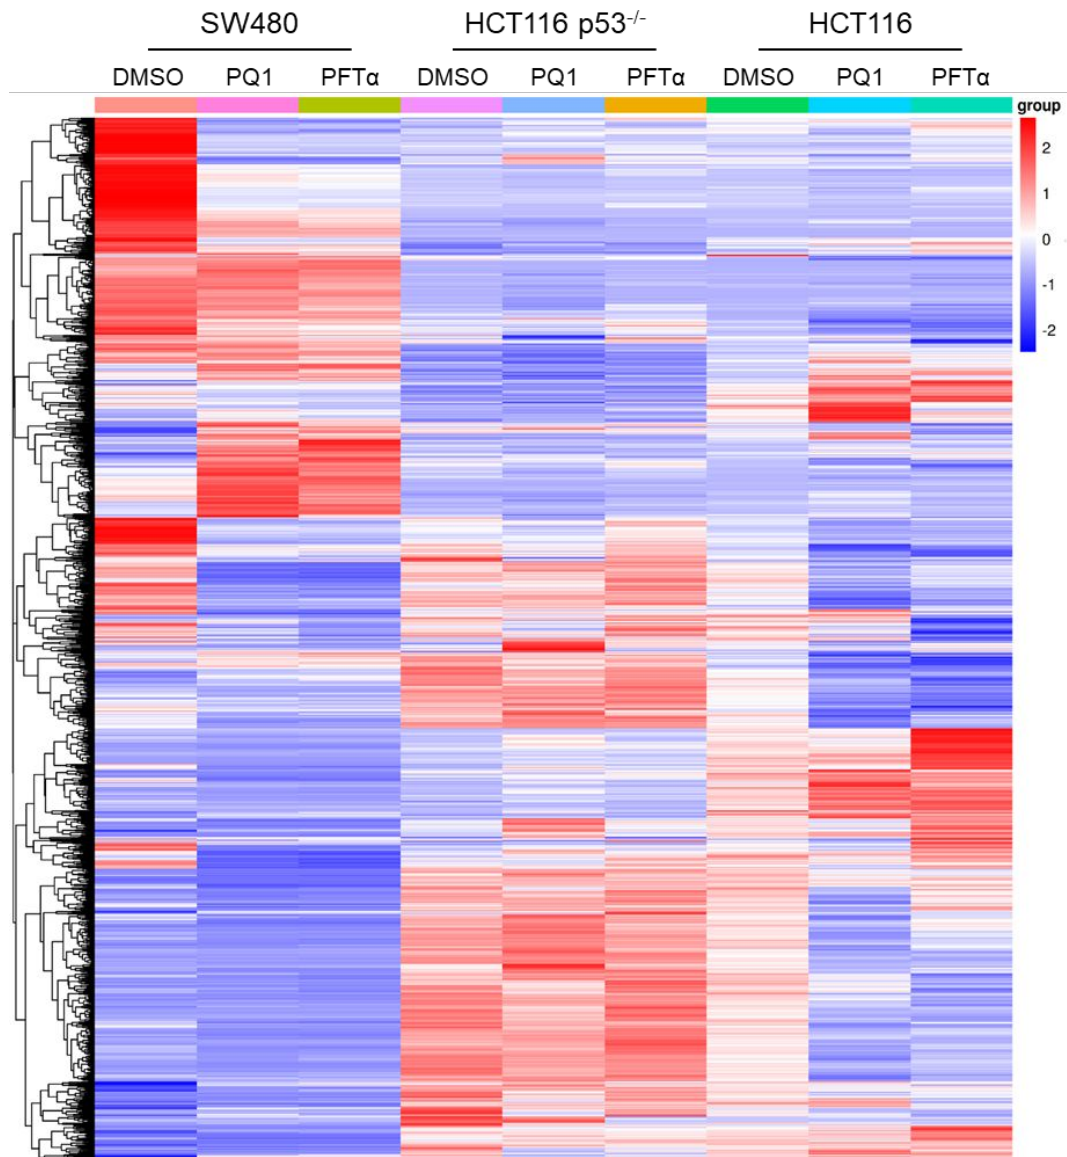

**Figure S3. Overview of the effect PQ1 and PFT $\alpha$  on the transcription profiles in cells.** Cluster heatmap based on the DEGs induced by PQ1 and PFT $\alpha$ . The transcriptional data were subjected to hierarchical clustering analysis.
